# Supplementary material for: Probing local structures of siliceous zeolite frameworks by solid-state NMR and first-principles calculations of 29Si–O–29Si scalar couplings
Source: Royal Society of Chemistry journal article supplement (doi:10.1039/b815361b), 2009-01-01
Supplement: b815361b.pdf [file b815361b.pdf]

## SUPPORTING INFORMATION

### Probing Local Structures of Siliceous Zeolite Frameworks by Solid-State NMR and First-Principles Calculations of $^{29}\text{Si-O-}^{29}\text{Si}$ Scalar Couplings

*Sylvian Cadars,<sup>a</sup> Darren H. Brouwer,<sup>b</sup> and Bradley F. Chmelka<sup>a,\*</sup>*

<sup>a</sup> Department of Chemical Engineering, University of California, Santa Barbara, California 93106, U.S.A.

<sup>b</sup> Steacie Institute for Molecular Sciences, National Research Council, 100 Sussex Drive, Ottawa Ontario, K1A 0R6, Canada.

#### Simulations of 2D DQ-SQ spectra for extracting $J$ -coupling constants.

Equation for calculating the pair of doublets in a 2D INADEQUATE double-quantum–single-quantum correlation NMR spectrum between resonances with isotropic chemical shifts  $\Omega_A$  and  $\Omega_B$ , with (tilted) Lorentzian peaks:

$$S(f_{SQ}, f_{DQ}) = \sum_{i=1}^4 A_i \left( \frac{2}{\pi w_{DQ}} \right) \left( \frac{w_{DQ}^2}{w_{DQ}^2 + 4[\Omega_A + \Omega_B - f_{DQ}]^2} \right) \times \left( \frac{2}{\pi w_{SQ}} \right) \left( \frac{w_{SQ}^2}{w_{SQ}^2 + 4[\Omega_i - f_{SQ} - \frac{1}{2}(\Omega_A + \Omega_B - f_{DQ})]^2} \right)$$

$$\Omega_1 = \Omega_A - \frac{1}{2} J_{AB}$$

$$\Omega_2 = \Omega_A + \frac{1}{2} J_{AB}$$

$$\Omega_3 = \Omega_B - \frac{1}{2} J_{AB}$$

$$\Omega_4 = \Omega_B + \frac{1}{2} J_{AB}$$

$$A_1 = A_4$$

$$A_2 = A_3$$

**Unit cell parameters and fractional coordinates of the structure of siliceous zeolite Sigma-2,  
as determined from single-crystal XRD analyses.<sup>1</sup>**

Space group: *I41/AMD* (# 141)

(10.2316 Å, 10.2316 Å, 34.3642 Å)

(90°, 90°, 90°)

| <u>Atom</u> | <u>Name</u> | <u>x</u> | <u>y</u> | <u>z</u> | <u>Occupancy</u> |
|-------------|-------------|----------|----------|----------|------------------|
| Si          | T1          | 0.28570  | 0.25000  | 0.11830  | 0.50000          |
| Si          | T2          | 0.28170  | 0.50000  | 0.00000  | 0.50000          |
| Si          | T4          | 0.15110  | 0.25000  | 0.19550  | 0.50000          |
| Si          | T3          | 0.15340  | 0.25000  | 0.03470  | 0.50000          |
| O           | O1          | 0.00000  | 0.25000  | 0.20670  | 0.25000          |
| O           | O2          | 0.21930  | 0.12200  | 0.21300  | 1.00000          |
| O           | O3          | 0.22850  | 0.25000  | 0.07530  | 0.50000          |
| O           | O4          | 0.16750  | 0.25000  | 0.14910  | 0.50000          |
| O           | O5          | 0.00000  | 0.25000  | 0.04240  | 0.25000          |
| O           | O6          | 0.19130  | 0.37750  | 0.01010  | 1.00000          |
| O           | O7          | 0.37200  | 0.37800  | 0.12500  | 0.50000          |

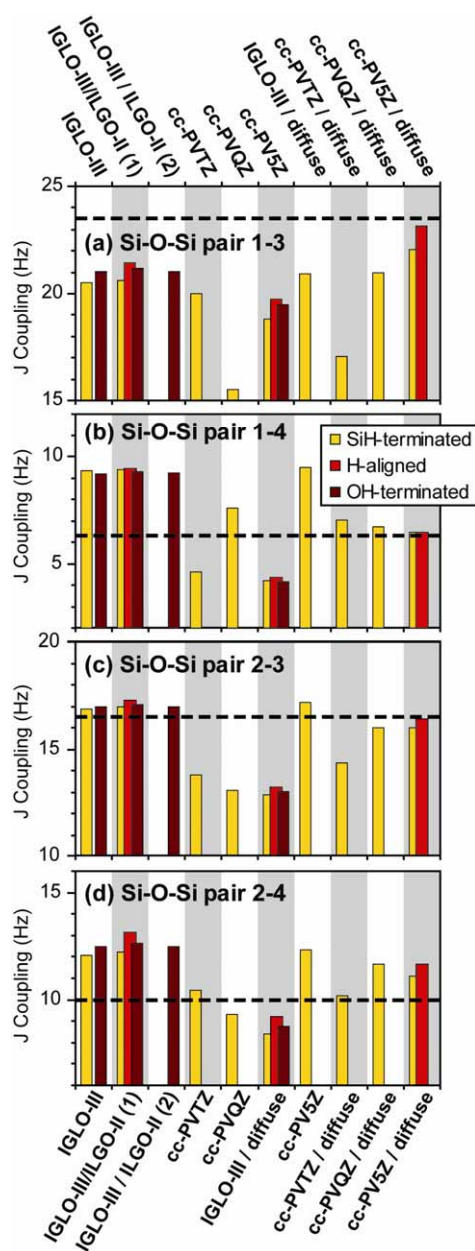

**Figure S1.** Histograms showing the  $^2J(^{29}\text{Si}-\text{O}-^{29}\text{Si})$  coupling constants calculated by DFT, using different cluster approaches to describe  $^{29}\text{Si}-\text{O}-^{29}\text{Si}$  site pairs (a) 1-3, (b) 1-4, (c) 2-3, and (d) 2-4 of the siliceous zeolite Sigma-2. Different groups of color bars along the  $x$ -axes correspond to different levels of descriptions (basis sets) that are referred to using the locally dense basis set (LDBS) labels defined in Table 1. The yellow, red, and brown colors correspond to the so-called “SiH-terminated”, “H-aligned”, and “OH-terminated” cluster definitions (see text for details), respectively, used for the calculations. The experimental  $J$ -coupling value is indicated on each histogram by a horizontal dashed line. The same vertical scale is used for all of the plots.

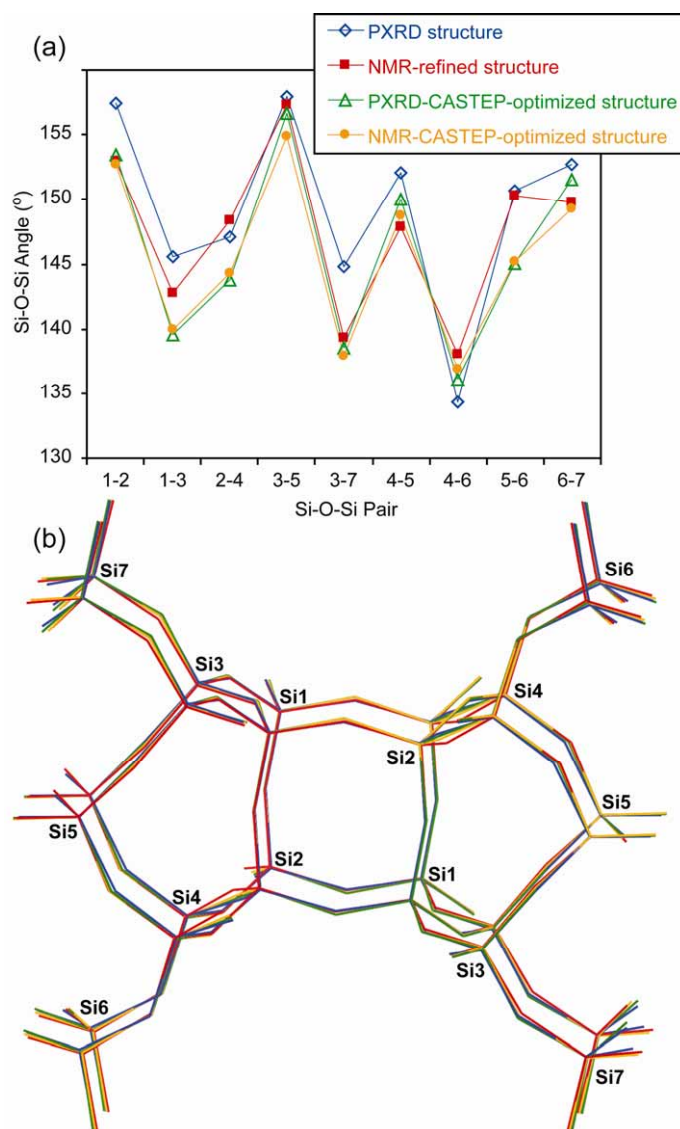

**Figure S2.** (a) Si-O-Si bond angles measured for zeolite ZSM-12 structures shown in (b) for each pair of  $^{29}\text{Si-O-}^{29}\text{Si}$  sites for which  $^2J(^{29}\text{Si-O-}^{29}\text{Si})$ -couplings can potentially be measured (*i.e.*, all connected pairs, but identical  $^{29}\text{Si}$  sites.) Bond angles extracted from the powder XRD and  $^{29}\text{Si}$ -NMR-refined structures are shown as blue open diamonds and red solid squares, respectively, and Si-O-Si angles measured from structures obtained by DFT optimizations of the powder XRD and  $^{29}\text{Si}$ -NMR-refined structures are shown as green open triangles and yellow solid circles, respectively. (b) Schematic representations of the zeolite framework structures of siliceous ZSM-12 obtained from powder X-ray diffraction (PXR) analyses<sup>2</sup> (blue), from structure refinements using  $^{29}\text{Si}$  chemical shift anisotropies<sup>3</sup> (red), and their DFT optimizations (green and yellow, respectively). Si atoms are labeled and separated by bridging O atoms.

**Unit cell parameters and fractional coordinates of the structure of siliceous zeolite ZSM-12,  
as determined from powder-XRD analyses.<sup>2</sup>**

Space group: *C2/C* (# 15)

(24.8633 Å, 5.0124 Å, 24.3275 Å)

(90°, 107.7215°, 90°)

| <u>Atom</u> | <u>Name</u> | <u>x</u> | <u>y</u> | <u>z</u> |
|-------------|-------------|----------|----------|----------|
| Si          | T1          | 0.44020  | 0.53190  | 0.41290  |
| Si          | T2          | 0.06780  | -0.07080 | 0.45890  |
| Si          | T3          | 0.37540  | 0.03200  | 0.36090  |
| Si          | T4          | 0.13380  | 0.42180  | 0.44840  |
| Si          | T5          | 0.28360  | 0.08220  | 0.42750  |
| Si          | T6          | 0.21390  | 0.58530  | 0.38320  |
| Si          | T7          | 0.28690  | 0.01000  | 0.24630  |
| O           | O1          | 0.42800  | 0.50530  | 0.47300  |
| O           | O2          | 0.50340  | 0.47250  | 0.42250  |
| O           | O3          | 0.42450  | 0.82200  | 0.38720  |
| O           | O4          | 0.33010  | -0.00450 | 0.39560  |
| O           | O5          | 0.08410  | -0.36240 | 0.45130  |
| O           | O6          | 0.34520  | -0.02180 | 0.29720  |
| O           | O7          | 0.25040  | 0.24410  | 0.26290  |
| O           | O8          | 0.26020  | 0.37160  | 0.40780  |
| O           | O9          | 0.15540  | 0.51010  | 0.39110  |
| O           | O10         | 0.18530  | 0.44800  | 0.50260  |
| O           | O11         | 0.29970  | 0.09050  | 0.18860  |
| O           | O12         | 0.39950  | 0.33700  | 0.37020  |
| O           | O13         | 0.10690  | 0.13720  | 0.43940  |
| O           | O14         | 0.23430  | 0.88280  | 0.40930  |

**Unit cell parameters and fractional coordinates of the structure of siliceous zeolite ZSM-12,  
based on  $^{29}\text{Si}$ -NMR-chemical-shift refinement of powder-XRD analyses.<sup>3</sup>**

Space group: *C2/C* (# 15)

(24.8633 Å, 5.0124 Å, 24.3275 Å)

(90°, 107.7215°, 90°)

| <u>Atom</u> | <u>Name</u> | <u>x</u> | <u>y</u> | <u>z</u> |
|-------------|-------------|----------|----------|----------|
| Si          | T1          | 0.06051  | 0.01576  | 0.08681  |
| Si          | T2          | 0.06895  | 0.06505  | 0.96065  |
| Si          | T3          | 0.37450  | 0.01422  | 0.36276  |
| Si          | T4          | 0.36436  | 0.07274  | 0.55175  |
| Si          | T5          | 0.28296  | 0.07964  | 0.42726  |
| Si          | T6          | 0.28935  | 0.08807  | 0.12110  |
| Si          | T7          | 0.28669  | 0.03678  | 0.24686  |
| O           | O1          | 0.07267  | -0.01767 | 0.02569  |
| O           | O2          | 0.00415  | 0.05663  | 0.92162  |
| O           | O3          | 0.42549  | 0.18699  | 0.88999  |
| O           | O4          | 0.33063  | 0.01234  | 0.89952  |
| O           | O5          | 0.40681  | 0.14010  | 0.03877  |
| O           | O6          | 0.34189  | 0.05509  | 0.79711  |
| O           | O7          | 0.25866  | 0.29514  | 0.26707  |
| O           | O8          | 0.24063  | 0.13213  | 0.59685  |
| O           | O9          | 0.34554  | 0.00364  | 0.10714  |
| O           | O10         | 0.30881  | 0.08737  | 0.49589  |
| O           | O11         | 0.30198  | 0.11274  | 0.18937  |
| O           | O12         | 0.10188  | 0.18795  | 0.63140  |
| O           | O13         | 0.10644  | 0.14017  | 0.43782  |
| O           | O14         | 0.23195  | 0.13366  | 0.90907  |

**Unit cell parameters and fractional coordinates of the structure of siliceous zeolite ZSM-12,  
based on DFT optimization of the powder-XRD structure.**

Space group: *C2/C* (# 15)

(24.8633 Å, 5.0124 Å, 24.3275 Å)

(90°, 107.7215°, 90°)

| <u>Atom</u> | <u>Name</u> | <u>x</u> | <u>y</u> | <u>z</u> |
|-------------|-------------|----------|----------|----------|
| Si          | T1          | 0.43895  | 0.53807  | 0.41271  |
| Si          | T2          | 0.06758  | -0.07613 | 0.45931  |
| Si          | T3          | 0.37448  | 0.03586  | 0.36166  |
| Si          | T4          | 0.13394  | 0.41902  | 0.44677  |
| Si          | T5          | 0.28335  | 0.08316  | 0.42777  |
| Si          | T6          | 0.21211  | 0.59114  | 0.38094  |
| Si          | T7          | 0.28553  | 0.01136  | 0.24533  |
| O           | O1          | 0.42678  | 0.50924  | 0.47413  |
| O           | O2          | 0.50345  | 0.46368  | 0.41925  |
| O           | O3          | 0.42742  | 0.83926  | 0.38859  |
| O           | O4          | 0.32935  | -0.00488 | 0.39671  |
| O           | O5          | 0.08521  | -0.38174 | 0.45328  |
| O           | O6          | 0.34508  | -0.03643 | 0.29462  |
| O           | O7          | 0.25029  | 0.23703  | 0.26741  |
| O           | O8          | 0.26282  | 0.38489  | 0.41017  |
| O           | O9          | 0.15381  | 0.49966  | 0.39168  |
| O           | O10         | 0.18880  | 0.43376  | 0.50323  |
| O           | O11         | 0.29837  | 0.10679  | 0.18758  |
| O           | O12         | 0.39707  | 0.33955  | 0.36692  |
| O           | O13         | 0.10869  | 0.12013  | 0.43799  |
| O           | O14         | 0.22986  | 0.88350  | 0.40868  |

**Unit cell parameters and fractional coordinates of the structure of siliceous zeolite ZSM-12,  
based on DFT optimization of the <sup>29</sup>Si-NMR-refined structure.**

Space group: *C2/C* (# 15)

(24.8633 Å, 5.0124 Å, 24.3275 Å)

(90°, 107.7215°, 90°)

| <u>Atom</u> | <u>Name</u> | <u>x</u> | <u>y</u> | <u>z</u> |
|-------------|-------------|----------|----------|----------|
| Si          | T1          | 0.06090  | 0.02825  | 0.08697  |
| Si          | T2          | 0.06770  | 0.07858  | 0.95936  |
| Si          | T3          | 0.37408  | 0.02676  | 0.36242  |
| Si          | T4          | 0.36540  | 0.08555  | 0.55281  |
| Si          | T5          | 0.28289  | 0.08679  | 0.42764  |
| Si          | T6          | 0.28843  | 0.09516  | 0.11969  |
| Si          | T7          | 0.28573  | 0.02966  | 0.24569  |
| O           | O1          | 0.07236  | 0.00137  | 0.02520  |
| O           | O2          | 0.00338  | 0.04857  | 0.91888  |
| O           | O3          | 0.42694  | 0.17115  | 0.88861  |
| O           | O4          | 0.32960  | 0.01151  | 0.89834  |
| O           | O5          | 0.41271  | 0.11685  | 0.04405  |
| O           | O6          | 0.34365  | 0.04390  | 0.79539  |
| O           | O7          | 0.25528  | 0.27179  | 0.26884  |
| O           | O8          | 0.23760  | 0.11416  | 0.59290  |
| O           | O9          | 0.34603  | -0.00018 | 0.10795  |
| O           | O10         | 0.30983  | 0.08261  | 0.49688  |
| O           | O11         | 0.30048  | 0.11887  | 0.18845  |
| O           | O12         | 0.10303  | 0.17041  | 0.63237  |
| O           | O13         | 0.10786  | 0.11846  | 0.43684  |
| O           | O14         | 0.22967  | 0.11508  | 0.90943  |



**References for Supporting Information section**

1. A. Stewart, *Zeolites*, 1989, **9**, 140-145.
2. C. A. Fyfe, H. Gies, G. T. Kokotailo, B. Marler and D. E. Cox, *J. Phys. Chem.*, 1990, **94**, 3718-3721.
3. D. H. Brouwer, *J. Magn. Reson.*, 2008, doi:10.1016/j.jmr.2008.1006.1020.
